# Supplementary material
Source: PubMed Central journal article supplement (PMC8115154)
Supplement: 41396_2020_865_MOESM1_ESM.pdf [file 41396_2020_865_MOESM1_ESM.pdf]

1 **Supplementary Material**

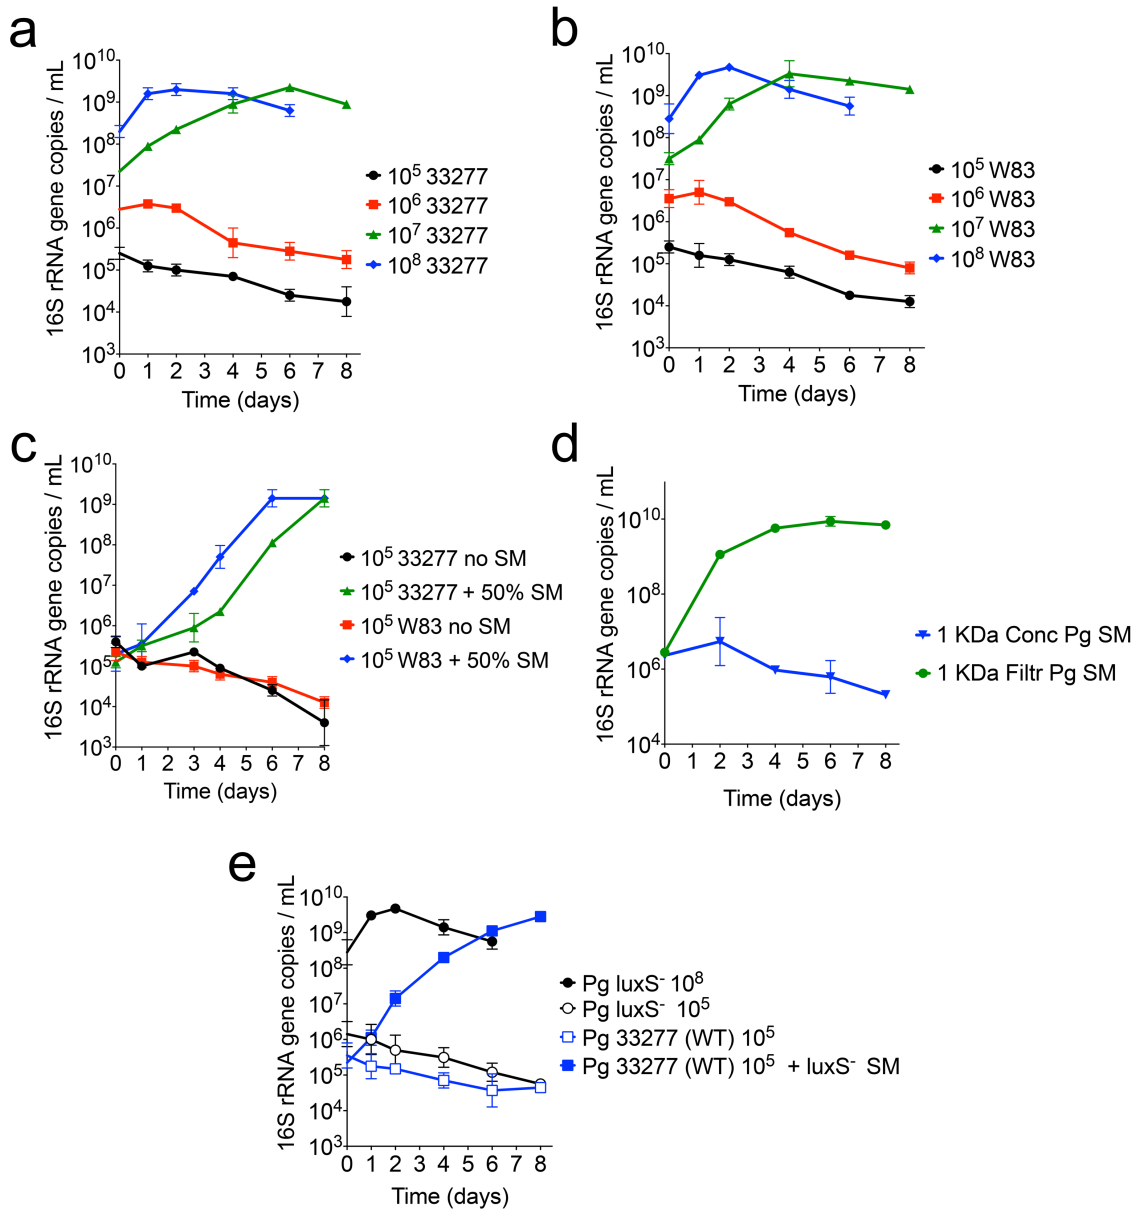

2

3 **Supplemental Figure 1. Cell-density dependent growth and effect of spent medium**

4 **(SM) on different strains of *P. gingivalis* (Pg).** Growth of Pg ATCC 33277 (a) and Pg

5 W83 (b) at different cell densities in mucin-serum. c. Effect of SM on the growth of Pg

6 ATCC 33277 and Pg W83 in mucin-serum. c. Pg 381 soluble factor capable of

7 supporting growth of low-cell-density Pg is smaller than 1 kDa. SM was obtained from

1 Pg 381 cultures grown in mucin-serum, then filtered through 3 kDa and 1 kDa  
2 membranes, followed by lyophilization and reconstitution (10x) in dH<sub>2</sub>O. Reconstituted  
3 filtrates were added to fresh mucin-serum medium (1:3, vol:vol) to evaluate growth of  
4 low-cell-density Pg (10<sup>5</sup> cells mL<sup>-1</sup>). e. Growth of a Pg  $\Delta luxS::ermF$  mutant (*luxS*<sup>-</sup>) at  
5 different cell densities in mucin-serum and effect of SM from the *luxS*<sup>-</sup> strain on growth  
6 of Pg ATCC 33277 (wild type).

7

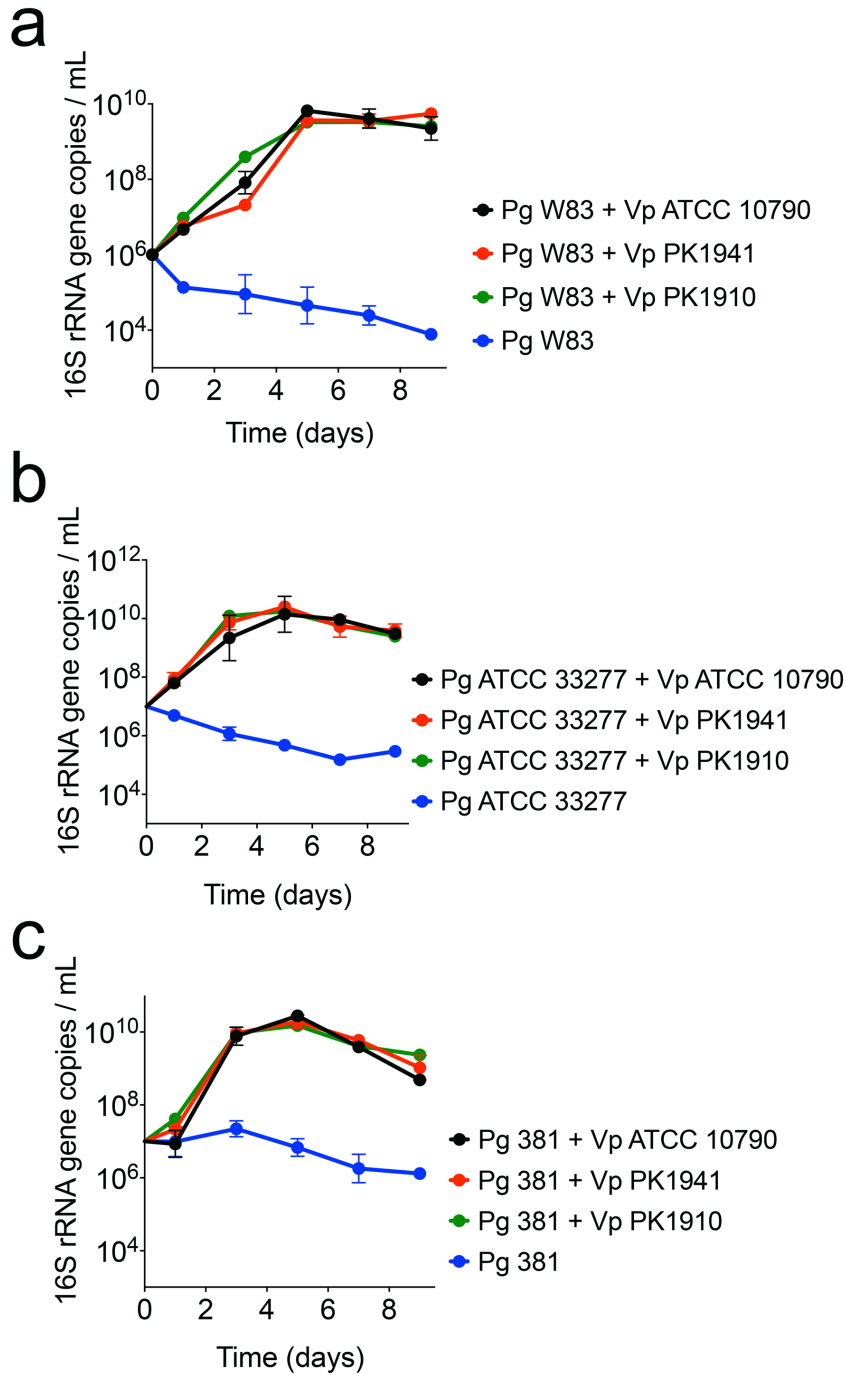

1

2

3 **Supplemental Figure 2. The interaction between *V. parvula* (Vp) and *P. gingivalis***

4 **(Pg) is not strain-specific.** Graphs show growth of Pg W83 (a), Pg ATCC 33277 (b) or

5 Pg 381 (c) as monocultures and in the presence of either Vp ATCC 10790, PK 1941 or

1 PK 1910. Inoculum size was  $10^5$  cells  $\text{mL}^{-1}$  and all experiments were conducted in mucin-  
2 serum medium. Data represent mean and standard deviations from three independent  
3 experiments.

4

1

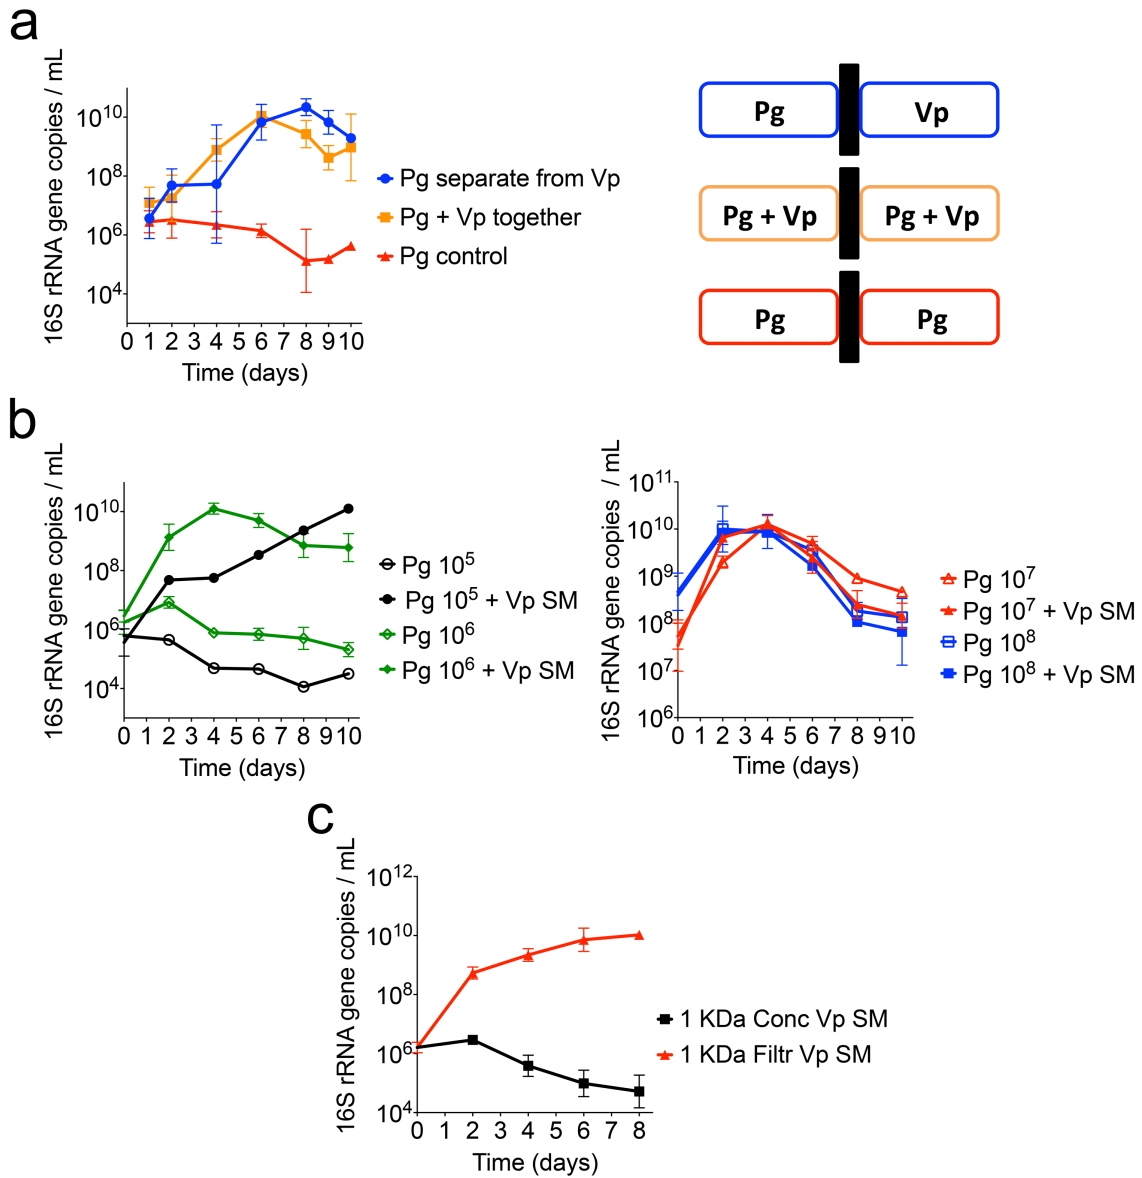

2

3 **Supplemental Figure 3. Characterization of the soluble factor mediating the support**

4 **of *V. parvula* (Vp) on the growth of *P. gingivalis* (Pg).** a. Physical contact between Pg

5 and Vp is not necessary to allow growth of a low-cell-density Pg inoculum. Pg and Vp

6 were grown in chambers separated by a filter membrane with a pore-size of 0.22  $\mu$ m. As

7 controls, Pg + Vp were inoculated together or Pg was inoculated in monoculture at both

1 sides of the membrane. Inoculation-density was  $10^5$  cells  $\text{mL}^{-1}$  for both species. **b.** Effect  
2 of Vp SM (24 h) on different Pg inoculum sizes. Left graph shows effect of Vp SM on Pg  
3 inoculated at  $10^5$  or  $10^6$  cells  $\text{mL}^{-1}$ , and right graph shows effect of Vp SM on Pg  
4 inoculated at  $10^7$  or  $10^8$  cells  $\text{mL}^{-1}$ . **c.** Vp soluble factor capable of supporting growth of  
5 low-cell-density Pg is smaller than 1 kDa. SM from Vp grown in mucin-serum was  
6 filtered through 3 kDa and then 1 kDa membranes, followed by lyophilization and  
7 reconstitution (10X) in  $\text{dH}_2\text{O}$ . Reconstituted fractions (Conc= fraction  $>1\text{kDa}$  and  
8 Filtr=fraction  $< 1\text{kDa}$ ) were added to fresh mucin-serum medium (1:3, vol:vol) to  
9 evaluate growth of low-cell-density Pg ( $10^5$  cells  $\text{mL}^{-1}$ ). Data in all panels represent  
10 replicates (mean and standard deviation) from at least three independent experiments.

11

12

1 **Supplementary Table 1.** List of compounds tested for their ability to induce growth of a  
2 low-cell-density inoculum of *P. gingivalis*. Experiments were performed with  
3 commercially available compounds in the indicated concentrations (middle column).

4

| Compound                                       | Tested concentration (mM)    | Effect on <i>P. gingivalis</i> |
|------------------------------------------------|------------------------------|--------------------------------|
| D-pantothenic acid (D-PA)                      | 0.005, 0.05 and 0.50         | No growth                      |
| D-panthenol                                    | 0.005, 0.05 and 0.50         | No growth                      |
| β-alanine                                      | 0.01, 0.10 and 1.0           | No growth                      |
| tyrosol                                        | 0.002, 0.02 and 0.20         | No growth                      |
| spermidine                                     | 0.069, 0.69 and 6.90         | No growth                      |
| spermine                                       | 0.000049, 0.00049 and 0.0049 | No growth                      |
| cadaverine                                     | 0.0979, 0.979 and 9.79       | No growth                      |
| putrescine                                     | 0.1134, 1.134 and 11.34      | No growth                      |
| 4-aminobenzoate/para-amino benzoic acid (pABA) | 0.0729, 0.729 and 7.29       | No growth                      |

5

6
